# Supplementary material
Source: publisher site journal article supplement (https://www.dovepress.com/article/219049)
Supplement: Supplementary file 1 [file get_supplementary_file.php]

**Supplemental Figure 1: Analysis of HIF target genes in a subset of pediatric IBD**

**cohort.** For indicated target genes, total RNA was isolated from colonic biopsies derived from pediatric non-colitis controls (n=7) and pediatric subjects with active IBD colitis (n=9). Quantitative PCR was used to analyze mRNA levels. Data are expressed transcript level derived from the differential threshold cycle number ( $2^{-CT}$ ) relative to actin

**Supplemental Figure 2: Pediatric Hemoglobin and Hematocrit levels compared to**

**Serum EPO levels** (A top) average Hemoglobin and (B top) Hematocrit of pediatric patients controls vs different levels of colitis \*p<0.05. Blood drawn within 30 days of the colonoscopy. (A bottom) regression analysis of Hgb vs serum EPO or (B bottom Hematocrit vs Serum EPO.

**Supplemental Figure 3: Adult Hemoglobin and Hematocrit levels compared to**

**Serum EPO levels** (A top) average Hemoglobin and (B top) Hematocrit of adult patients controls vs different levels of colitis \*p<0.05. Blood drawn within 30 days of the colonoscopy. (A bottom) regression analysis of Hgb vs serum EPO or (B bottom) Hematocrit vs Serum EPO.

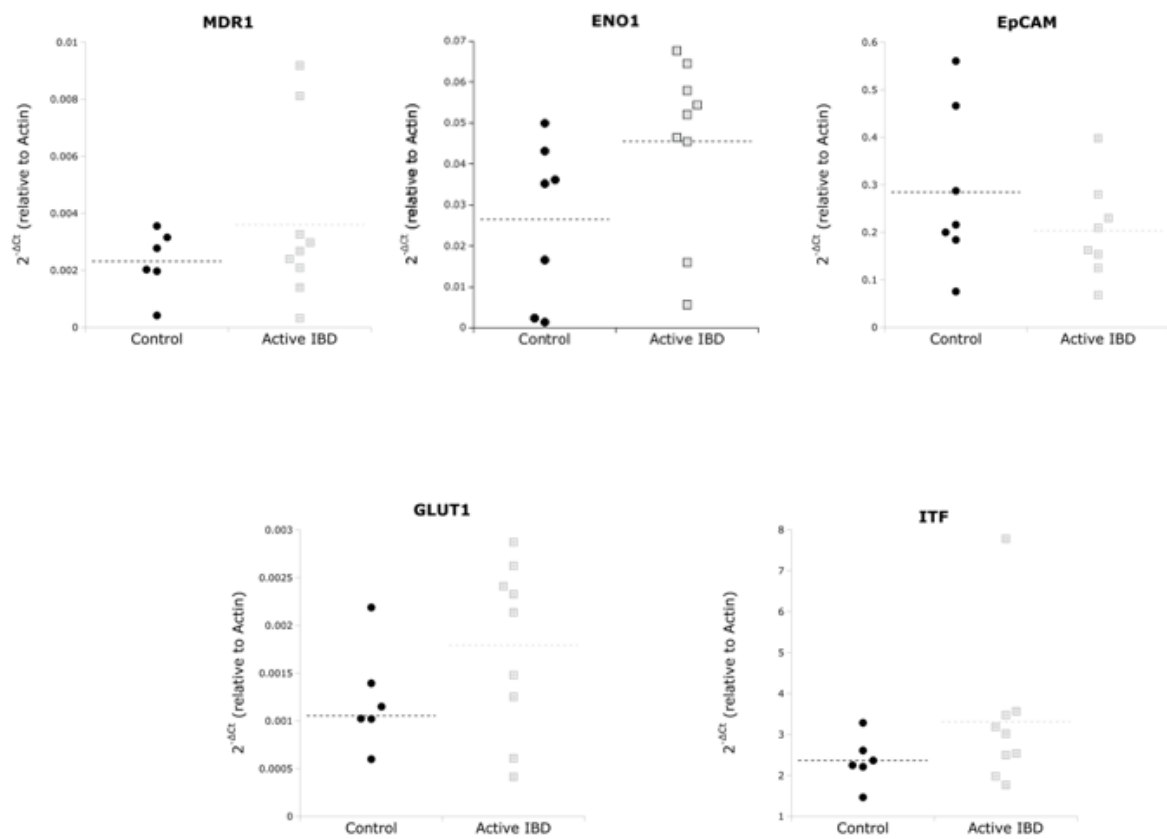

Supplemental Figure 1

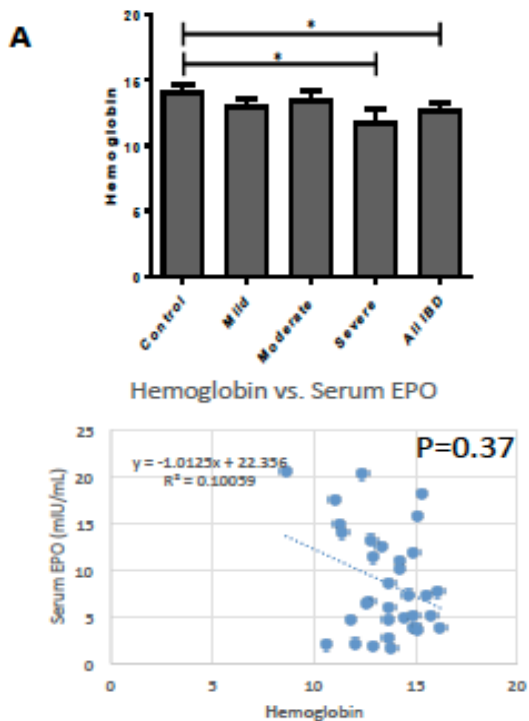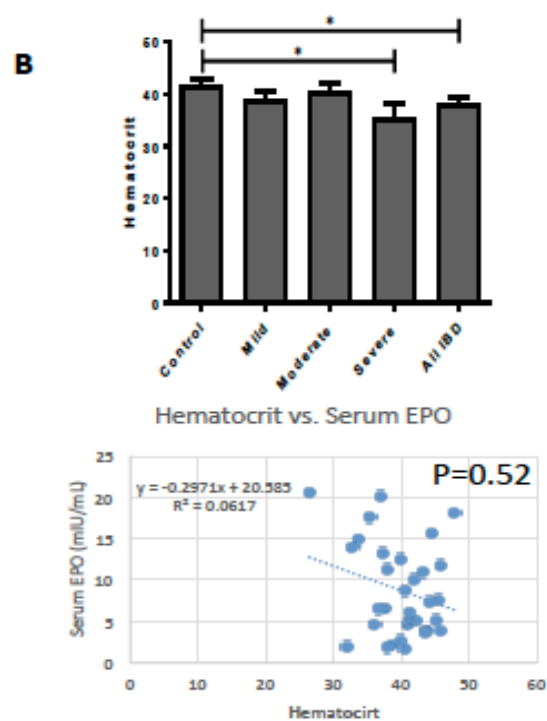

Supplemental Figure 2

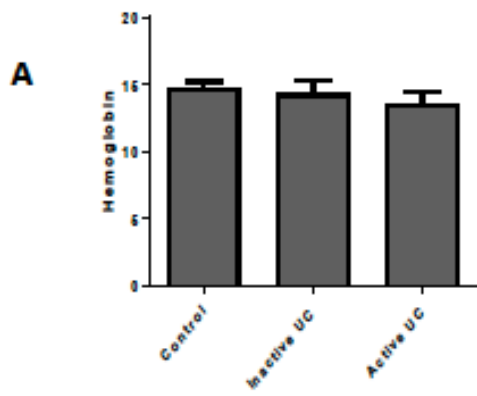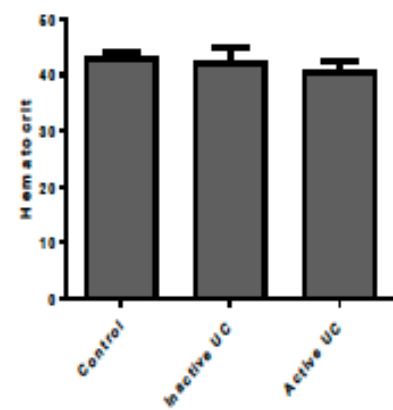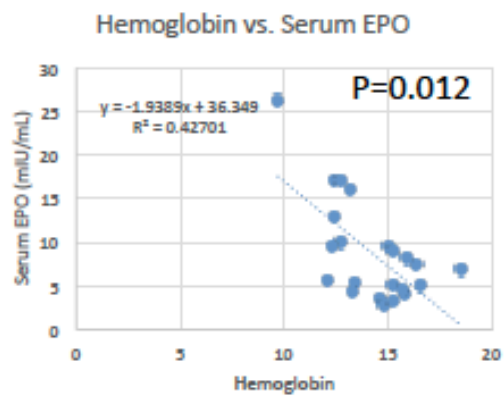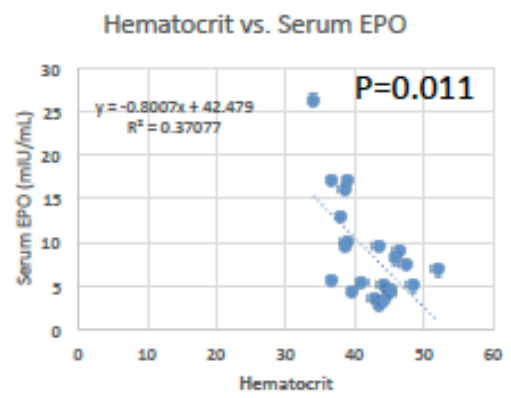

Supplemental Figure 3
